# Supplementary material for: scONE-seq: A one-tube single-cell multi-omics method enables simultaneous dissection of molecular phenotype and genotype heterogeneity from frozen tumors
Source: Research Square preprint supplement (doi:10.21203/rs.3.rs-956200/v2), 2021-10-15
Supplement: Supplementary file 1 [file a09cfbc48ff0174152e51726.docx]

**Supplementary Note**

In the table below we have summarized some of the key advantages of scONE-seq compared to G&T-seq and DR-seq. From the published data, DR-seq appears to suffer from GC-bias in the DNA amplification, and the overall amplification uniformity is worse (Supplementary Fig. 1a), whereas G&T-seq has reasonably good DNA data, but due to the numerous washing steps required to release non-specific DNA from the RNA capture beads, the sensitivity of transcript detection appears to be lowered (Supplementary Fig. 1c). scONE-seq has a much higher overall single-cell amplification success rate, and we speculate this is due to having no transfer steps, thus minimizing loss. Since the quality of the data is high, we only needed to sequence ~1M reads per cell on average to obtain sufficient depth for both RNA and DNA to perform clonal analysis and cell-type classification. From the published data, DR-seq required almost 10-fold more sequencing depth to achieve similar coverage. This represents a substantial cost savings in sequencing by scONE-seq.

The time required for each protocol was estimated from published versions. Due to having only one reaction for each cell, scONE-seq only takes 8 hours per plate, and uses just one purification step at the very end. Overall, scONE-seq produces better data with less experimental time and lower cost.

|  | **G&T-seq**  (Macauley et al.  Nature Methods 2015) | **DR-seq**  (Dey et al.  Nature Biotechnology 2015) | **scONE-seq** |
| --- | --- | --- | --- |
| **Approach for distinguishing DNA from RNA** | polyT-bead based separation of polyA-RNA from the DNA for separate DNA and RNA library construction | Barcoding of RNA with RT primer to generate barcoded cDNA, followed by pre-amplification of cDNA and gDNA together, and then splitting the entire pool for separate DNA and mRNA library construction | DNA-specific barcoding with Tn5 and RNA-specific barcoding with RT primer in a single tube, followed by co-amplification with a common primer and joint library construction, with *in-silico* demultiplexing of DNA and RNA |
| **Can be used for total RNA-seq?** | No | No | Yes |
| **Single cell amplification success rate (both WGS and RNA pass QC)** | 75.6% | 70% | 90% |
| **% GC of DNA reads** | 40% (normal) | 50% (biased) | 40% (normal) |
| **Time needed from cell to pre-amplified library** | **14h** for one 96 plate | **24h** for one 96 plate  (incl. 13h IVT incubation time) | **8h** for one 96 plate |
| **Labor demand** | Requires 3 purification steps per 96 plate; beads-based separation step needs to be performed manually with care | Requires 2 purfication steps per 96 plate; requires repeated addition of enzymes between every cycle of quasilinear amplification for 7 cycles total | Only 1 purification step per 96 plate at the very end |
| **Library construction** | Tagmentation based library construction | DNA library is prepared with a sonication-based method | Tagmentation based library construction |
| **Automation capability** | Can be automated with a pipetting robot | Difficult to automate effectively due to the repeated enzyme adding step between cycles | Can be automated with a standard liquid handler or a pipetting robot |
